# Supplementary material for: Clinically Relevant Correction of Recessive Dystrophic Epidermolysis Bullosa by Dual sgRNA CRISPR/Cas9-Mediated Gene Editing
Source: PubMed Central journal article supplement — Mol Ther. 2019 Mar 15;27(5):986–98. doi: 10.1016/j.ymthe.2019.03.007 (PMC6520462; doi:10.1016/j.ymthe.2019.03.007), 2019-03-15
Supplement: mmc1.pdf [file mmc1.pdf]

## **Supplemental Information**

### **Clinically Relevant Correction of Recessive Dystrophic Epidermolysis Bullosa by Dual sgRNA CRISPR/Cas9-Mediated Gene Editing**

**Jose Bonafont, Ángeles Mencía, Marta García, Raúl Torres, Sandra Rodríguez, Marta Carretero, Esteban Chacón-Solano, Silvia Modamio-Høybjør, Lucía Marinas, Carlos León, María J. Escamez, Ingrid Hausser, Marcela Del Río, Rodolfo Murillas, and Fernando Larcher**

## Supplementary Figure 1

| Indel               | P1 BR1 | P1 BR2 | P2 BR1 | P2 BR2 |                                                                                      |
|---------------------|--------|--------|--------|--------|--------------------------------------------------------------------------------------|
| $\Delta 55+insT$    | 62.23  | 68.95  | 75.05  | 75.24  | GTGCCCTCTCT-----AACCTTCACCTGTCTTGCC                                                  |
| $\Delta 55$         | 9.76   | 13.55  | 12.04  | 11.8   | GTGCCCTCTC-----AACCTTCACCTGTCTTGCC                                                   |
| $\Delta 55+insTA$   | 2.48   | 1.08   | 2.68   | 2.06   | GTGCCCTCTCTA-----AACCTTCACCTGTCTTGCC                                                 |
| $\Delta 1$          | 0.47   | 1.25   | 0.94   | 0.35   | GTGCCCTCTCT-TGTAGGGTCTGCAGGGTCCAAGAGGCCCCCGGCCAGTGGTGTAGTACCCAAAGAACCTTCACCTGTCTTGCC |
| $\Delta 56+insT$    | 0.43   | 0.5    | 0.47   | 0.9    | GTGCCCTCTCT-----ACCTTCACCTGTCTTGCC                                                   |
| $\Delta 55+insTAT$  | 0.34   | 0.16   | 0.47   | 0.15   | GTGCCCTCTCTAT-----AACCTTCACCTGTCTTGCC                                                |
| Unedited            | 2.48   | 0.41   | 0.16   | 0.1    | GTGCCCTCTCTATGTAGGGTCTGCAGGGTCCAAGAGGCCCCCGGCCAGTGGTGTAGTACCCAAAGAACCTTCACCTGTCTTGCC |
| $\Sigma \Delta E80$ | 87.07  | 93.31  | 95.88  | 95.43  |                                                                                      |

**Supplementary Figure 1. Next Generation Sequencing of PCR amplicons spanning the double cleavage site for in depth characterization of repair events at the on-target region.** Percentage of reads corresponding to the most frequent indel variants common to all samples are shown. Total percentage of variants lacking E80 ( $\Sigma \Delta E80$ ) are indicated below.

## Supplementary Figure 2

|           | P1 Control | P1 BR1 | P1 BR2 | P2 Control | P2 BR1 | P2 BR2 |
|-----------|------------|--------|--------|------------|--------|--------|
| ON-TARGET | 1,83       | 97,17  | 99,58  | 0,72       | 99,61  | 99,65  |
| OFFT 1    | 0,46       | 0,60   | 0,56   | 0,19       | 0,45   | 0,26   |
| OFFT 2    | 0,10       | 0,17   | 0,53   | 0,05       | 0,20   | 0,07   |
| OFFT 3    | 0,21       | 0,49   | 0,52   | 0,13       | 0,28   | 0,58   |
| OFFT 4    | 0,10       | 0,17   | 0,45   | 0,03       | 0,00   | 0,06   |
| OFFT 5    | 0,12       | 0,15   | 0,39   | 0,06       | 0,20   | 0,25   |
| OFFT 6    | 0,18       | 0,20   | 0,36   | 0,05       | 0,02   | 0,00   |
| OFFT 7    | 0,15       | 0,11   | 0,34   | 0,16       | 0,07   | 0,09   |
| OFFT 8    | 0,19       | 0,16   | 0,31   | 0,12       | 0,04   | 0,14   |
| OFFT 9    | 0,20       | 0,14   | 0,31   | 0,51       | 0,18   | 0,07   |
| OFFT 10   | 0,00       | 0,00   | 0,29   | 0,00       | 0,00   | 0,00   |
| OFFT 11   | 0,03       | 0,09   | 0,29   | 0,18       | 0,21   | 0,05   |
| OFFT 12   | 0,09       | 0,15   | 0,28   | 0,04       | 0,14   | 0,07   |
| OFFT 13   | 0,10       | 0,30   | 0,28   | 0,19       | 0,23   | 0,09   |
| OFFT 14   | 0,29       | 0,19   | 0,28   | 0,52       | 0,23   | 0,12   |
| OFFT 15   | 0,14       | 0,30   | 0,28   | 0,02       | 0,00   | 0,00   |
| OFFT 16   | 0,17       | 0,12   | 0,27   | 0,27       | 0,31   | 0,19   |
| OFFT 17   | 0,14       | 0,20   | 0,26   | 0,16       | 0,21   | 0,11   |
| OFFT 18   | 0,00       | 0,28   | 0,25   | 0,35       | 0,15   | 0,08   |
| OFFT 19   | 0,08       | 0,22   | 0,25   | 0,08       | 0,29   | 0,33   |
| OFFT 20   | 0,18       | 0,13   | 0,25   | 0,28       | 0,11   | 0,05   |
| OFFT 21   | 0,24       | 0,17   | 0,24   | 0,09       | 0,09   | 0,00   |
| OFFT 22   | 0,04       | 0,05   | 0,23   | 0,08       | 0,06   | 0,13   |
| OFFT 23   | 0,29       | 0,30   | 0,23   | 0,24       | 0,62   | 0,36   |
| OFFT 24   | 0,03       | 0,23   | 0,23   | 0,15       | 0,03   | 0,14   |
| OFFT 25   | 0,39       | 0,00   | 0,21   | 0,39       | 0,14   | 0,17   |
| OFFT 26   | 0,21       | 0,09   | 0,21   | 0,05       | 0,00   | 0,14   |
| OFFT 27   | 0,11       | 0,13   | 0,21   | 0,10       | 0,17   | 0,17   |
| OFFT 28   | 0,22       | 0,17   | 0,21   | 0,04       | 0,14   | 0,02   |
| OFFT 29   | 0,18       | 0,18   | 0,20   | 0,00       | 0,26   | 0,03   |
| OFFT 30   | 0,16       | 0,23   | 0,20   | 0,06       | 0,10   | 0,05   |
| OFFT 31   | 0,00       | 0,00   | 0,19   | 0,00       | 0,04   | 0,00   |
| OFFT 32   | 0,14       | 0,08   | 0,19   | 0,09       | 0,15   | 0,05   |
| OFFT 33   | 0,12       | 0,17   | 0,19   | 0,12       | 0,45   | 0,30   |
| OFFT 34   | 0,08       | 0,17   | 0,19   | 0,00       | 0,05   | 0,04   |
| OFFT 35   | 0,15       | 0,10   | 0,19   | 0,12       | 0,18   | 0,16   |
| OFFT 36   | 0,00       | 0,04   | 0,19   | 0,00       | 0,17   | 0,08   |
| OFFT 37   | 0,07       | 0,15   | 0,18   | 0,09       | 0,23   | 0,20   |
| OFFT 38   | 0,10       | 0,11   | 0,18   | 0,23       | 0,09   | 0,11   |
| OFFT 39   | 0,20       | 0,29   | 0,18   | 0,05       | 0,07   | 0,10   |
| OFFT 40   | 0,11       | 0,30   | 0,17   | 0,14       | 0,07   | 0,16   |
| OFFT 41   | 0,10       | 0,12   | 0,17   | 0,12       | 0,30   | 0,10   |
| OFFT 42   | 0,11       | 0,09   | 0,17   | 0,03       | 0,14   | 0,00   |
| OFFT 43   | 0,00       | 0,05   | 0,17   | 0,03       | 0,03   | 0,10   |
| OFFT 44   | 0,03       | 0,14   | 0,16   | 0,14       | 0,15   | 0,07   |
| OFFT 45   | 0,03       | 0,09   | 0,16   | 0,00       | 0,07   | 0,00   |
| OFFT 46   | 0,06       | 0,07   | 0,16   | 0,02       | 0,04   | 0,04   |
| OFFT 47   | 0,06       | 0,12   | 0,15   | 0,04       | 0,07   | 0,01   |
| OFFT 48   | 0,03       | 0,03   | 0,15   | 0,04       | 0,08   | 0,12   |
| OFFT 49   | 0,03       | 0,11   | 0,15   | 0,02       | 0,05   | 0,01   |
| OFFT 50   | 0,03       | 0,09   | 0,15   | 0,04       | 0,12   | 0,06   |

**Supplementary Figure 2. Frequencies of indel detection for the 50 highest ranking off-target sites.** Percentages of indel-containing NGS reads are shown for each site and sample. Frequencies above the 0.52% threshold are highlighted in red. On-target NGS frequencies are shown in grey (top row).

### Supplementary Figure 3

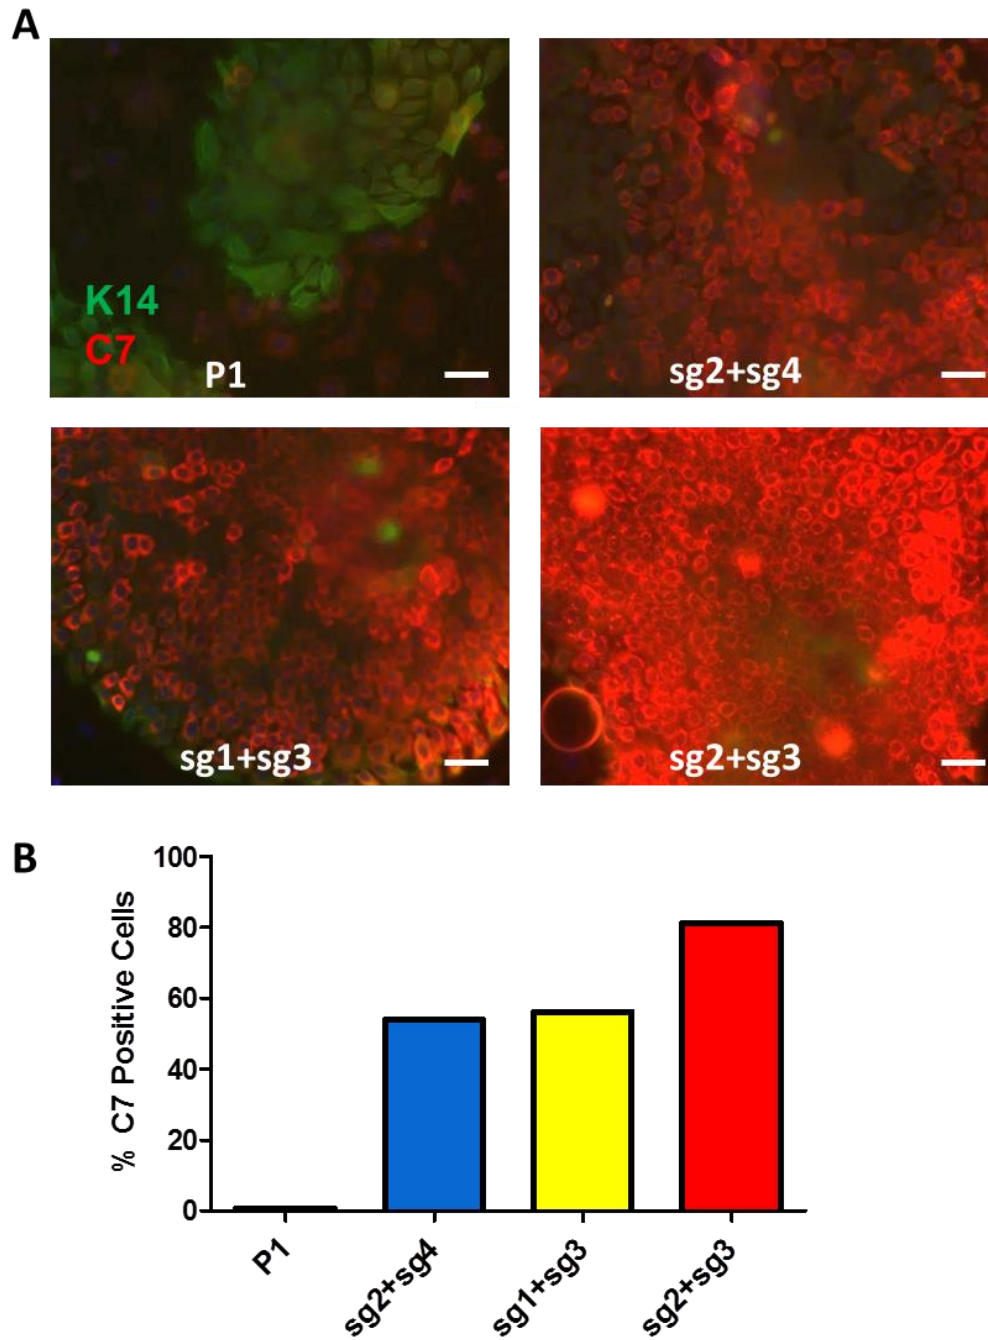

**Supplementary Figure 3. Immunodetection of C7 in primary RDEB patient P1 keratinocytes treated with different RNP combinations.** A) Double immunofluorescence C7/K14 staining showing the extent of C7 expressing cells after treatment with the different RNPs. Keratin-14 (green) was used to distinguish keratinocytes. Bars: 50 $\mu$ m. B) Percentage of C7-expressing RNP-treated keratinocytes detected by flow cytometry after immunolabeling with anti-C7 antibody.

## Supplementary Figure 4

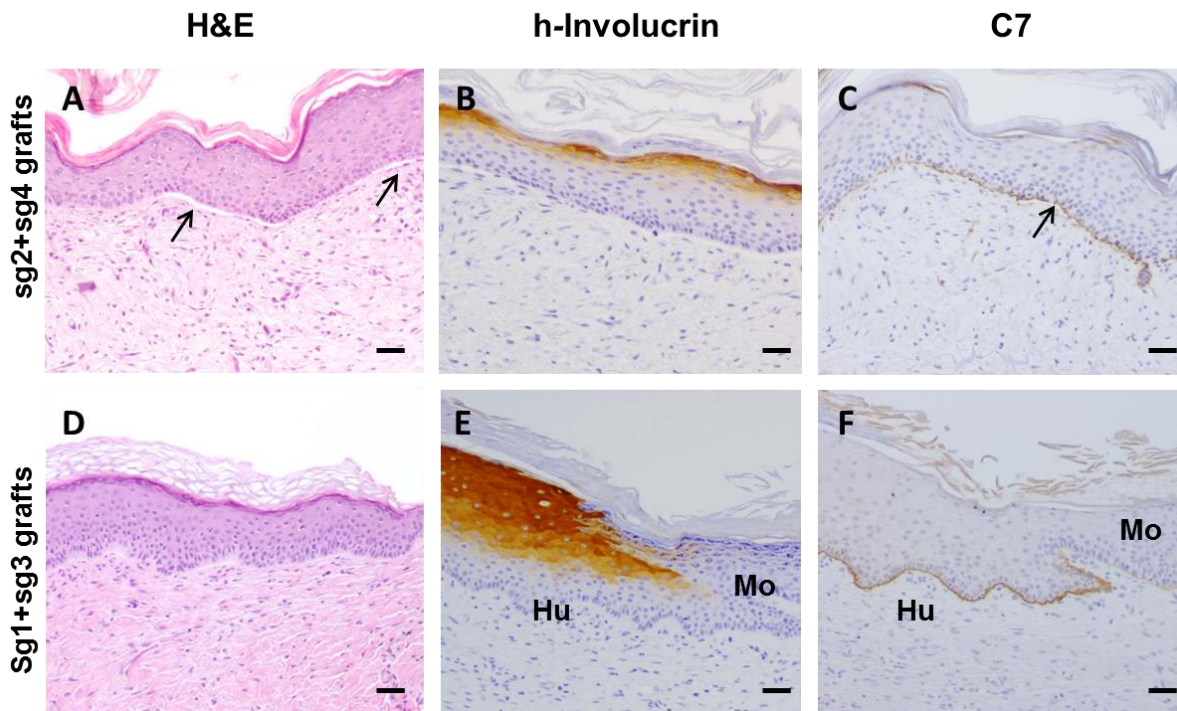

**Supplementary Figure 4. Histopathological and immunohistochemical analysis of grafts produced with keratinocytes modified with additional RNP combinations.** (A, D) H&E staining of 12-week-old grafts from RDEB keratinocytes modified with sg2+sg4 (A) and sg1+sg3 (D) RNP pairs. (B, E) h-Involucrin immunohistochemical detection in grafts from polyclonal keratinocytes treated with sg2+sg4 (B) and sg1+sg3 (E). (C, F) C7 immunoperoxidase detection in grafts from polyclonal keratinocytes treated with sg2+sg4 (C) and sg1+sg3 (F) treated RDEB keratinocytes. Grafts generated with RDEB keratinocytes treated with the combination sg2+sg4 show scattered microblisters (arrows) (A, C) concomitant with the lower and patchy C7 expression (C). Grafts generated with the combination sg1+sg3 (D, F) do not show blistering signs (D) and display continuous C7 expression (F). Hu and Mo correspond to human and mouse tissue, respectively. Bars: 100  $\mu$ m.

## Supplementary Figure 5

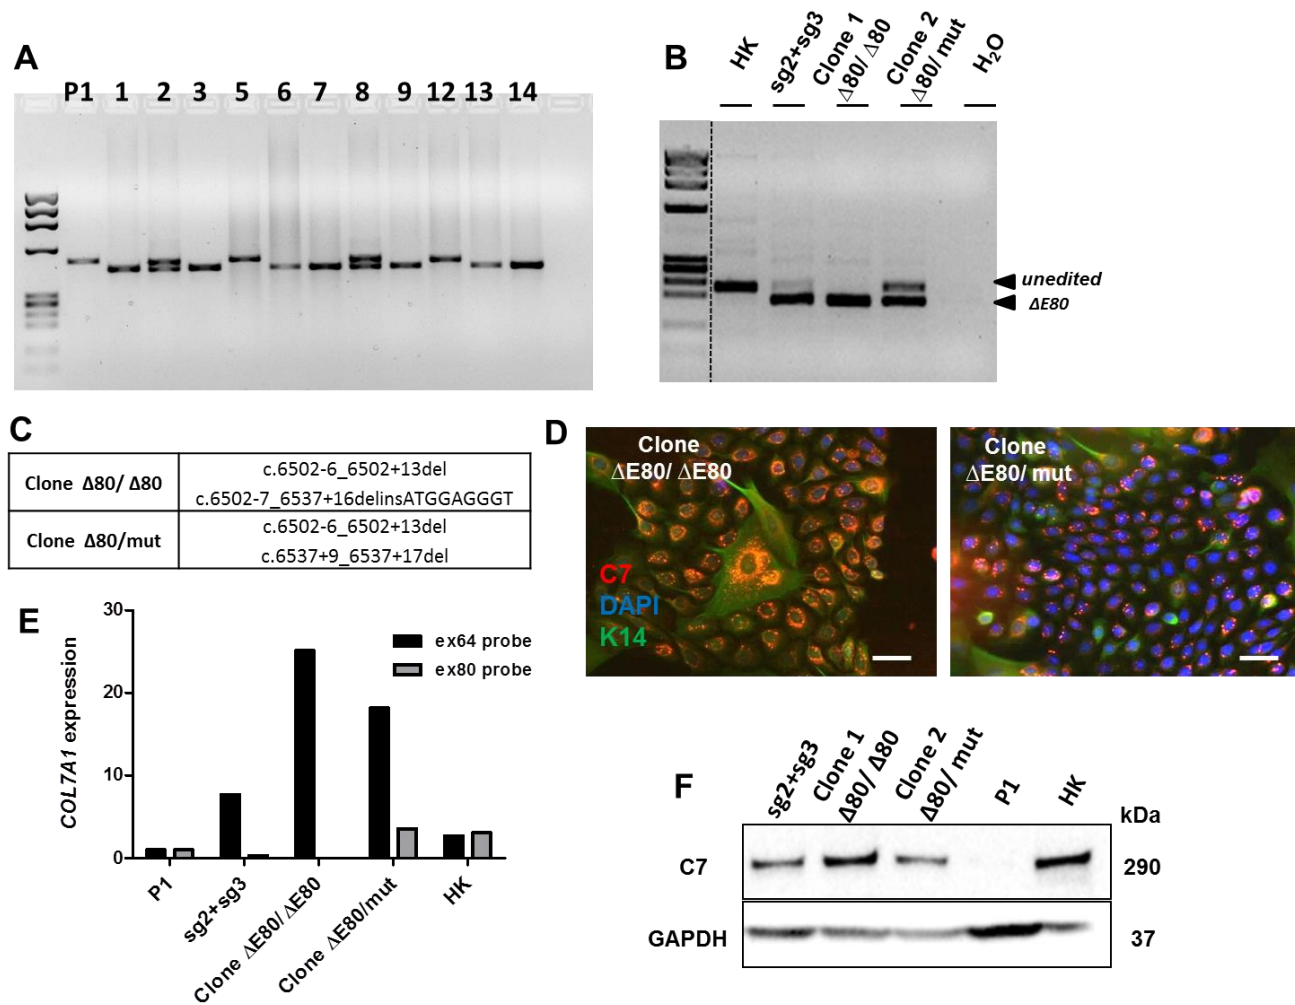

**Supplementary Figure 5. DNA, RNA and protein characterization of monoallelically and biallelically E80-deleted clones.** (A) PCR genotype of the 11 isolated E80-deleted clones, showing alleles lacking E80 (lower band). (B) RT-PCR of variants of transcripts present in the two clones. Biallelically modified clone showed only shorter  $\Delta E80$ -transcripts. (C) *COL7A1* alleles revealed by Sanger sequencing in each edited clone. (D) Immunofluorescence detection of C7 expression in both edited clones. Bars: 50  $\mu$ m. (E) qPCR quantification of *COL7A1* expression with two different exon-specific probes. (F) Western Blot protein expression quantification of the sg2+sg3 pool and the two isolated clones.

## Supplementary Figure 6

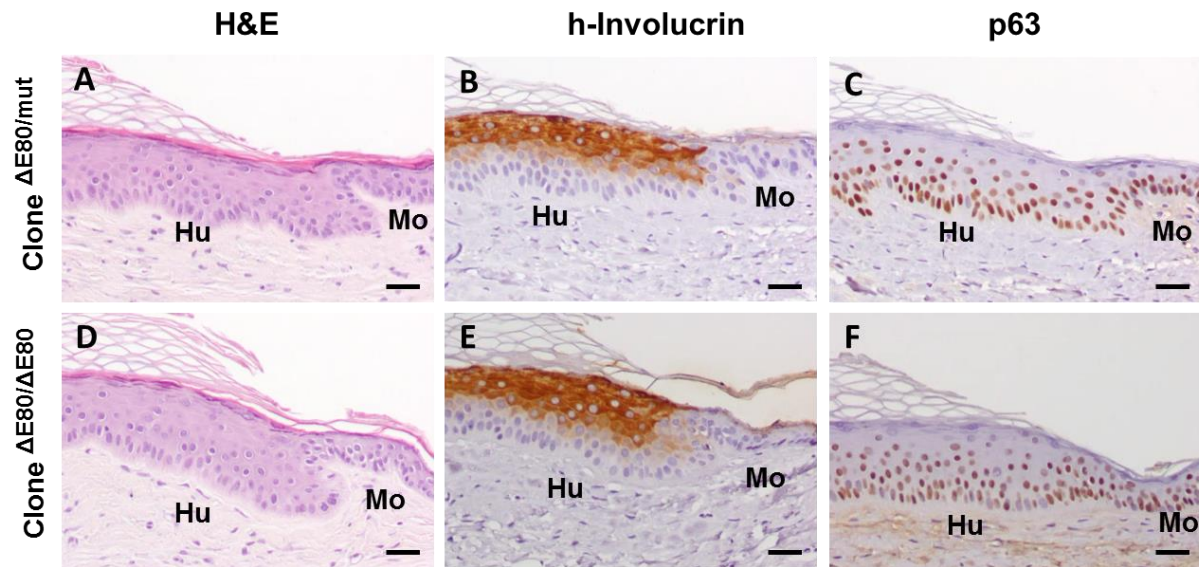

**Supplementary Figure 6. Additional phenotypic characterization of clonal mono and bi-allelic  $\Delta E80$  grafts.** (A, D), Histology (H&E staining). (B, E) human involucrin expression. (C, F) p63 expression at the Human (Hu), mouse (Mo) boundary. These markers demonstrate that clonal grafts maintain normal features of epidermal differentiation and long-term skin regenerative performance. Top panels: Monoallelic correction ( $\Delta E80/mut$ ) clone. Lower panels: Bi-allelic correction ( $\Delta E80/\Delta E80$ ) clone. Bars: 100  $\mu m$ .

Supplementary Figure 7

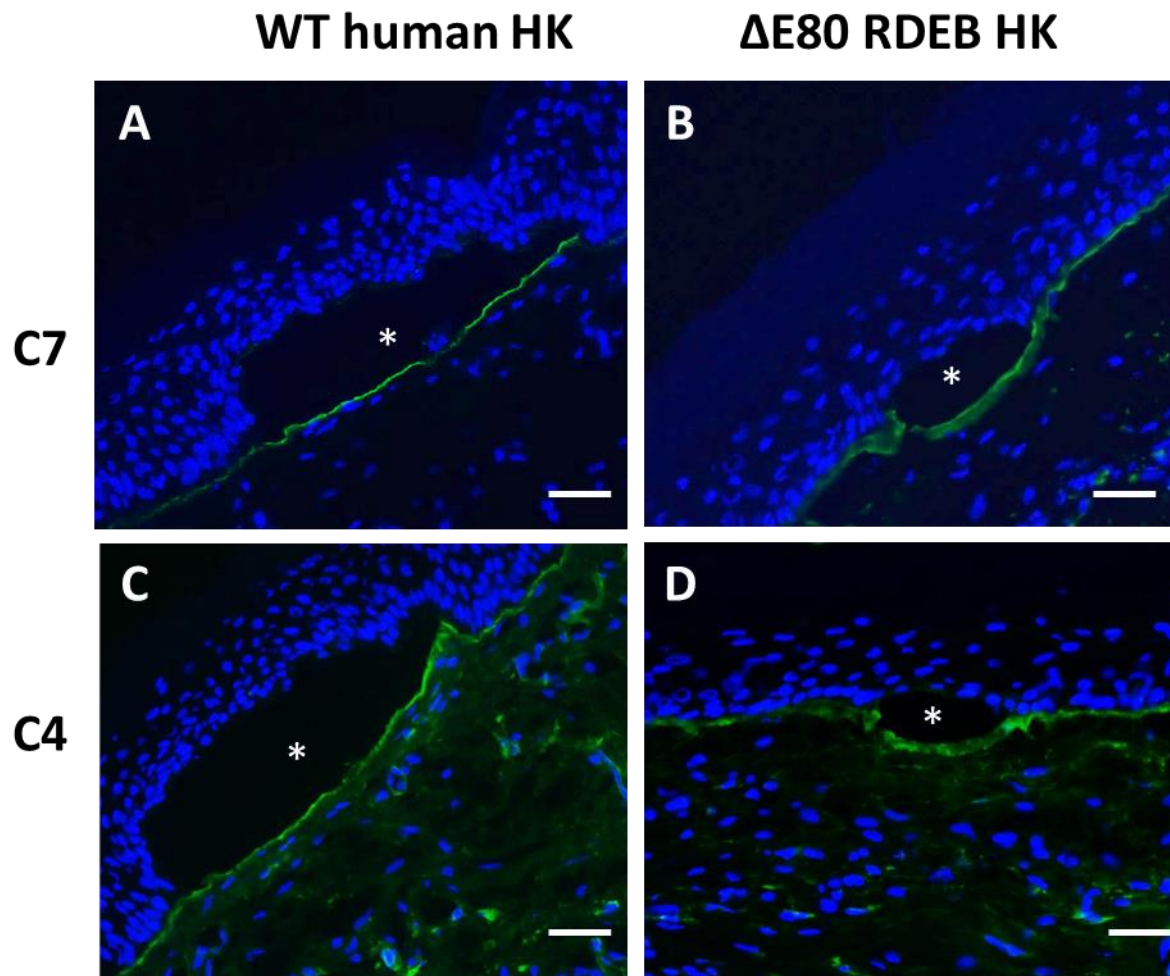

**Supplementary Figure 7. Cleavage plane analysis in suction-induced blisters in control and gene edited RDEB grafts.** Immunofluorescence of C7 (A, B) and C4 (C, D) was performed on consecutive frozen tissue sections from blisters induced in normal human (A, C) and  $\Delta$ E80 RDEB (B, D) keratinocyte grafts. C7 and C4 at the floor of the blister demonstrate cleavage between basal keratinocyte and *lamina lucida*. The asterisks indicate dermal-epidermal separation. Nuclei are stained with DAPI. Bars: 100  $\mu$ m.
